# Supplementary material for: Chronic Environmental and Occupational Lead Exposure and Kidney Function among African Americans: Dallas Lead Project II
Source: PubMed Central journal article supplement (PMC6313544; doi:10.3390/ijerph15122875), 2018-12-14
Supplement: ijerph-15-02875-s001.pdf [file ijerph-15-02875-s001.pdf]

**Supplementary Table S1. Selected studies of the effects of lead exposure on kidney function.**

| Author                | Population                           | Study                           | Blood lead levels-mean                                           | Effect                                                                                                                                                                                                                                                                                        |
|-----------------------|--------------------------------------|---------------------------------|------------------------------------------------------------------|-----------------------------------------------------------------------------------------------------------------------------------------------------------------------------------------------------------------------------------------------------------------------------------------------|
| Muntner [13] 2003     | NHANES III- USA 1988–1994            | Cross-sectional<br>N= 15,211    | 4.21 µg/dL- HTH<br>3.3 µg/dL- no HTN                             | Comparing highest to lowest quartile of lead levels OR of increased creatinine 2.41 and of CKD 2.60 in those with hypertension, OR increased in men and women, in AA OR increased for CKD but not increased creatinine, no effect in normotensives                                            |
| Staessen [14] 1992    | Belgium- Cadmibel study 1985–1989    | Cross-sectional<br>N= 1,981     | 11.4 µg /dL- men<br>7.5 µg/dL- women                             | Every 10 fold increase in blood lead levels was associated with a 10–13 ml/min decrease in creatinine clearance. Measured creatinine clearance was decreased by 10 mL/min in men and 13 mL/min in women. Calculated creatinine clearance was reduced 13 mL/min in men and 30 mL/min in women. |
| Munter [15] 2005      | NHANES III and NHANES 1999–2002- USA | Cross-sectional<br>N= 26,570    | 2.76 µg/dL- NHANES III<br>1.64 µg/dL- 1999-2002<br>Higher in men | Comparing highest to lowest quartile of lead levels OR of CKD 1.92                                                                                                                                                                                                                            |
| Staessen [16] 1990    | London- civil servants               | Cross-sectional<br>N= 531       | 11.4 µg /dL- men<br>9.6 µg/dL- women                             | In men for each 25% increase in blood lead level the serum creatinine increased 0.6 mmol/L (NS), no effect on serum creatinine in women, no effect on blood pressure                                                                                                                          |
| Payton [17] 1994      | Normative Aging Study VA 1988–1991   | Cross-sectional<br>N= 774 men   | 8.1 µg/dL                                                        | Every 10.0 µg/dL rise in blood lead level was associated with a 10.4 mL/min decrease in creatinine clearance                                                                                                                                                                                  |
| Kim [18] 1996         | Normative Aging Study VA 1979–1994   | Retrospective cohort<br>459 men | 9.9 µg/dL                                                        | A 10-fold increase in blood lead levels was associated with a 0.08 mg/dL increase in serum creatinine concentration                                                                                                                                                                           |
| Tsaih [19] 2004       | Normative Aging Study VA 1991–1995   | Prospective<br>448 men          | 6.5 µg/dL                                                        | Increased rate of rise of serum creatinine in the highest versus lowest quartile of blood lead levels that was more pronounced in those with diabetes.                                                                                                                                        |
| Navas-Acien [20] 2009 | NHANES 1999- 2006- USA               | Cross-sectional<br>N= 14,778    | 1.58 µg/dL                                                       | Comparing highest to lowest quartile of blood lead levels OR of CKD 1.56                                                                                                                                                                                                                      |
| Spector [21] 2011     | NHANES 1999–2002 USA                 | Cross-sectional<br>N= 3,941     | 2.1 µg/dL- men<br>1.4 µg/dL- women                               | In patients aged ≥60 comparing highest to lowest tertile of blood lead levels there was a 7.1 mL/min/1.73 m <sup>2</sup> decline in eGFR. Each doubling of lead level was associated with a 3.3 mL/min/1.73 m <sup>2</sup> decline in eGFR                                                    |

|                 |        |                                        |           |                                                                            |
|-----------------|--------|----------------------------------------|-----------|----------------------------------------------------------------------------|
| Yu [22]<br>2004 | Taiwan | Prospective- 4 yrs<br>121 CKD patients | 4.2 µg/dL | Each 1.0 µg/dL increase in blood lead level reduced the<br>GFR by 4 mL/min |
|-----------------|--------|----------------------------------------|-----------|----------------------------------------------------------------------------|

Abbreviations: VA- Veteran's Affairs, NHANES- National Health and Nutrition Examination Survey, OR- odds ratio, CKD- chronic kidney disease, AA- African Americans, NS- not significant.

**Supplementary Table S2. Selected studies of the effects of occupational lead exposure on kidney function.**

| <b>Author</b>            | <b>Country</b> | <b>Mean lead level (µg/dL)</b> | <b>N</b> | <b>Exposure</b>                                                                                                                                          | <b>Effect</b>                                                                                                                                                                                       |
|--------------------------|----------------|--------------------------------|----------|----------------------------------------------------------------------------------------------------------------------------------------------------------|-----------------------------------------------------------------------------------------------------------------------------------------------------------------------------------------------------|
| Gennart [34]<br>1992     | Belgium        | 51.0                           | 81       | Battery factory<br>Controls- 81 nonexposed workers in the finishing and maintenance department of the same factory, hospital warehouse, chemical factory | No renal effects                                                                                                                                                                                    |
| Weaver [35]<br>2003      | Korea          | 32.0                           | 803      | Many different lead industries<br>Controls- 98 air conditioner assembly plant and university employees                                                   | Association with increased BUN                                                                                                                                                                      |
| Oktem [36]<br>2004       | Turkey         | 7.79                           | 79       | Auto repair shop<br>Controls- 71 people living in a rural area                                                                                           | No effect on GFR                                                                                                                                                                                    |
| Gerhardsson [37]<br>1992 | Sweden         | 31.9<br>(median)               | 100      | Smelter<br>Control- 41 truck assembly workers with no lead exposure living more than 140 km from the smelter                                             | Urinary albumin, β <sub>2</sub> -microglobulin and NAG increased, no change in creatinine                                                                                                           |
| Baker [38]<br>1979       | USA            | 16–280<br>(range)              | 160      | Two smelters, chemical plant<br>No controls                                                                                                              | 8 subjects with elevated creatinine                                                                                                                                                                 |
| de Almeida [39]<br>1987  | Brazil         | 64.1                           | 52       | Smelter<br>Controls- 44 paper mill workers in the same city                                                                                              | 32.7% with creatinine >1.5 mg/dL                                                                                                                                                                    |
| Chia [40]<br>1995        | Singapore      | NA                             | 137      | Lead stabilizer<br>153 postal workers with no history of lead exposure                                                                                   | 8 with decreased creatinine clearance, elevated urine β <sub>2</sub> -microglobulin                                                                                                                 |
| Greenberg [41]<br>1986   | USA            | 32                             | 38       | Enamel paint<br>No controls                                                                                                                              | Creatinine clearance normal, 2 with proteinuria and 3 with elevated urine β <sub>2</sub> -microglobulin                                                                                             |
| Lilis [42]<br>1980       | USA            | NA                             | 269      | High level exposure- lead smelter low level exposure- cable manufacturers, cable splicers, firearms instructors, no controls                             | Lead levels correlated with BUN and urine β <sub>2</sub> microglobulin, 18% creatinine >1.2 mg/dL, 8% creatinine >1.4 mg/dL, 20 workers with >20 years exposure 45% Had serum creatinine >1.4 mg/dL |
| Verschoor [43]<br>1980   | Netherlands    | 47.5                           | 155      | Lead industry workers<br>Controls- insulation, drain pipe and concrete workers with no lead exposure                                                     | Increased urine retinol binding protein and NAG                                                                                                                                                     |
| Buchet [44]<br>1980      | Belgium        | 44.3                           | 25       | Smelter<br>Controls- judged to be nonexposed by plant doctor                                                                                             | No renal effects                                                                                                                                                                                    |
| Ehrlich [45]<br>1998     | South Africa   | 53.5                           | 382      | Battery factory<br>No controls                                                                                                                           | Lead levels correlated with serum creatinine                                                                                                                                                        |
| dos Santos [46]<br>1994  | Brazil         | 36.8                           | 166      | Battery factory<br>Controls- 60 nonexposed workers                                                                                                       | Increased urine NAG, no albuminuria, no increase in creatinine                                                                                                                                      |
| Omae [47]<br>1990        | Japan          | 36.5                           | 165      | Lead storage battery manufacturing plant<br>No controls                                                                                                  | No renal effects                                                                                                                                                                                    |

Abbreviations: km- kilometers, BUN- blood urea nitrogen, GFR- glomerular filtration rate, NAG-N-acetyl-β-glucosaminidase.
